# Supplementary material for: “Breathing” organic cation to stabilize multiple structures in low-dimensional Ge-, Sn-, and Pb-based hybrid iodide perovskites
Source: Royal Society of Chemistry journal article supplement (doi:10.1039/d2qi01247b), 2022-01-01
Supplement: d2qi01247b1.pdf [file d2qi01247b1.pdf]

Supporting Information (SI):

**“Breathing” organic cation to stabilize multiple structures in low-dimensional Ge-, Sn-, and Pb-based hybrid iodide perovskites**

Congcong Chen,<sup>a</sup> Emily E. Morgan,<sup>b</sup> Yang Liu,<sup>a</sup> Jian Chen,<sup>a</sup> Ram Seshadri<sup>b</sup> and Lingling Mao<sup>\*a</sup>

*a* Department of Chemistry, Southern University of Science and Technology, Shenzhen, 518055, P. R. China

*b* Materials Research Laboratory and Materials Department, University of California, Santa Barbara, California 93106, United States

Section I. Crystallographic tables

Section II. Simulated and experimental powder X-ray diffraction (PXRD) patterns

Section III. Extra structural illustrations

Section I. Crystallographic tables

**Table S1.** Crystal data and structure refinement for (ETU)<sub>4</sub>Ge<sub>5</sub>I<sub>18</sub>, (ETU)GeI<sub>4</sub> and (ETU)SnI<sub>4</sub> at 298 K.

| Compound                                            | (ETU) <sub>4</sub> Ge <sub>5</sub> I <sub>18</sub>                                             | (ETU)GeI <sub>4</sub>                                            | (ETU)SnI <sub>4</sub>                                            |
|-----------------------------------------------------|------------------------------------------------------------------------------------------------|------------------------------------------------------------------|------------------------------------------------------------------|
| Formula                                             | C <sub>12</sub> H <sub>44</sub> Ge <sub>5</sub> I <sub>18</sub> N <sub>12</sub> S <sub>4</sub> | C <sub>3</sub> H <sub>11</sub> GeI <sub>4</sub> N <sub>3</sub> S | C <sub>3</sub> H <sub>11</sub> I <sub>4</sub> N <sub>3</sub> SSn |
| $M_r / \text{g}\cdot\text{mol}^{-1}$                | 3131.98                                                                                        | 701.40                                                           | 747.50                                                           |
| $T$ (K)                                             | 298                                                                                            | 298                                                              | 298                                                              |
| Crystal System                                      | Triclinic                                                                                      | Orthorhombic                                                     | Orthorhombic                                                     |
| Space Group                                         | <i>P</i> -1                                                                                    | <i>Pbca</i>                                                      | <i>Pbca</i>                                                      |
| $a / \text{\AA}$                                    | 8.6160(5)                                                                                      | 19.178(3)                                                        | 19.472(4)                                                        |
| $b / \text{\AA}$                                    | 10.9195(6)                                                                                     | 12.2635(17)                                                      | 12.509(2)                                                        |
| $c / \text{\AA}$                                    | 18.0200(11)                                                                                    | 25.280(4)                                                        | 25.392(4)                                                        |
| $\alpha / ^\circ$                                   | 81.199(2)                                                                                      | 90                                                               | 90                                                               |
| $\beta / ^\circ$                                    | 87.561(2)                                                                                      | 90                                                               | 90                                                               |
| $\gamma / ^\circ$                                   | 70.561(2)                                                                                      | 90                                                               | 90                                                               |
| $V / \text{\AA}^3$                                  | 1579.84(16)                                                                                    | 5945.7(15)                                                       | 6185.2(19)                                                       |
| $Z$                                                 | 1                                                                                              | 16                                                               | 16                                                               |
| $\rho_{\text{calcd}} (\text{g}\cdot\text{cm}^{-3})$ | 3.292                                                                                          | 3.134                                                            | 3.211                                                            |
| $\mu (\text{mm}^{-1})$                              | 11.303                                                                                         | 10.477                                                           | 9.742                                                            |
| $F(000)$                                            | 1378                                                                                           | 4960                                                             | 5248                                                             |
| Reflections collected                               | 19386                                                                                          | 41787                                                            | 6325                                                             |
| Independent reflections                             | 5808                                                                                           | 5466                                                             | 220                                                              |
| GOF on $F^2$                                        | 1.232                                                                                          | 1.204                                                            | 1.031                                                            |
| $R_1, wR_2 [I \geq 2\sigma(I)]^a$                   | 0.0466/0.1144                                                                                  | 0.0366, 0.0869                                                   | 0.0569, 0.1046                                                   |
| $R_1, wR_2$ (all data) <sup>b</sup>                 | 0.0528/0.1190                                                                                  | 0.0528, 0.0999                                                   | 0.1537, 0.1392                                                   |
| Largest diff. peak/hole (e $\text{\AA}^{-3}$ )      | 1.32/-4.85                                                                                     | 2.09/-3.61                                                       | 1.27/-1.65                                                       |

<sup>a</sup> $R_1 = \sum ||F_o| - |F_c|| / \sum |F_o|$ . <sup>b</sup> $wR_2 = [\sum w(F_o^2 - F_c^2)^2 / \sum w(F_o^2)^2]^{1/2}$

**Table S2.** Crystal data and structure refinement for (ETU)PbI<sub>4</sub> at 100 K and (ETU)<sub>3</sub>Pb<sub>2</sub>I<sub>10</sub> at 298 K.

| Compound                                                | (ETU)PbI <sub>4</sub>                                            | (ETU) <sub>3</sub> Pb <sub>2</sub> I <sub>10</sub>                                           |
|---------------------------------------------------------|------------------------------------------------------------------|----------------------------------------------------------------------------------------------|
| Formula                                                 | C <sub>3</sub> H <sub>11</sub> I <sub>4</sub> N <sub>3</sub> PbS | C <sub>9</sub> H <sub>33</sub> I <sub>10</sub> N <sub>9</sub> Pb <sub>2</sub> S <sub>3</sub> |
| $M_r / \text{g}\cdot\text{mol}^{-1}$                    | 836.00                                                           | 2047.02                                                                                      |
| $T$ (K)                                                 | 100                                                              | 298                                                                                          |
| Crystal System                                          | Monoclinic                                                       | Trigonal                                                                                     |
| Space Group                                             | $P2_1/c$                                                         | $R-3$                                                                                        |
| $a / \text{\AA}$                                        | 12.2987(6)                                                       | 15.0135(19)                                                                                  |
| $b / \text{\AA}$                                        | 12.5368(6)                                                       | 15.0135(19)                                                                                  |
| $c / \text{\AA}$                                        | 19.8230(10)                                                      | 31.781(4)                                                                                    |
| $\alpha / ^\circ$                                       | 90                                                               | 90                                                                                           |
| $\beta / ^\circ$                                        | 92.204(2)                                                        | 90                                                                                           |
| $\gamma / ^\circ$                                       | 90                                                               | 120                                                                                          |
| $V / \text{\AA}^3$                                      | 3054.2(3)                                                        | 6203.8(18)                                                                                   |
| $Z$                                                     | 8                                                                | 6                                                                                            |
| $\rho_{\text{calcd}} (\text{g}\cdot\text{cm}^{-3})$     | 3.636                                                            | 3.287                                                                                        |
| $\mu (\text{mm}^{-1})$                                  | 19.240                                                           | 15.764                                                                                       |
| $F(000)$                                                | 2880                                                             | 5352                                                                                         |
| Reflections collected                                   | 43292                                                            | 5926                                                                                         |
| Independent reflections                                 | 5607                                                             | 4081                                                                                         |
| GOF on $F^2$                                            | 1.024                                                            | 0.985                                                                                        |
| $R_1, wR_2 [I \geq 2\sigma(I)]^a$                       | 0.0713, 0.1898                                                   | 0.0398, 0.0920                                                                               |
| $R_1, wR_2$ (all data) <sup>b</sup>                     | 0.0779, 0.1962                                                   | 0.0581, 0.0997                                                                               |
| Largest diff. peak/hole ( $\text{e}\ \text{\AA}^{-3}$ ) | 6.99/-10.76                                                      | 1.84/-3.75                                                                                   |

<sup>a</sup> $R_1 = \sum ||F_o| - |F_c|| / \sum |F_o|$ . <sup>b</sup> $wR_2 = [\sum w(F_o^2 - F_c^2)^2 / \sum w(F_o^2)^2]^{1/2}$

**Table S3.** Structural parameters for the low dimensional perovskites in this work.

| Compounds                                          | Space group                       | Metals | $\Delta d$ (bond length distortion index) | $\sigma^2$ (bond angle variance) |
|----------------------------------------------------|-----------------------------------|--------|-------------------------------------------|----------------------------------|
| (ETU) <sub>4</sub> Ge <sub>5</sub> I <sub>18</sub> | <i>P</i> -1                       | Ge1    | 0.00522                                   | 6.3326                           |
|                                                    |                                   | Ge2    | 0.05874                                   | 11.3104                          |
|                                                    |                                   | Ge3    | 0.06004                                   | 18.8684                          |
| (ETU)GeI <sub>4</sub>                              | <i>Pbca</i>                       | Ge1    | 0.08157                                   | 27.3030                          |
|                                                    |                                   | Ge2    | 0.08235                                   | 23.7656                          |
| (ETU)SnI <sub>4</sub>                              | <i>Pbca</i>                       | Sn1    | 0.02521                                   | 6.4817                           |
|                                                    |                                   | Sn2    | 0.03848                                   | 19.0447                          |
| (ETU)PbI <sub>4</sub>                              | <i>P2</i> <sub>1</sub> / <i>c</i> | Pb1    | 0.01091                                   | 3.0167                           |
|                                                    |                                   | Pb2    | 0.01460                                   | 7.6529                           |
| (ETU) <sub>3</sub> Pb <sub>2</sub> I <sub>10</sub> | <i>R</i> -3                       | Pb1    | 0.00850                                   | 16.2803                          |
|                                                    |                                   | Pb2    | 0.00000                                   | 95.8555                          |
|                                                    |                                   | Pb3    | 0.00000                                   | 0.7449                           |

**Table S4.** M-I-M angles in (ETU)<sub>4</sub>Ge<sub>5</sub>I<sub>18</sub>, (ETU)GeI<sub>4</sub>, (ETU)SnI<sub>4</sub>, (ETU)PbI<sub>4</sub> and (ETU)<sub>3</sub>Pb<sub>2</sub>I<sub>10</sub>.

| Compound                                           | Labels           | Angles (°) |
|----------------------------------------------------|------------------|------------|
| (ETU) <sub>4</sub> Ge <sub>5</sub> I <sub>18</sub> | Ge(1)-I(2)-Ge(2) | 161.88(3)  |
|                                                    | Ge(2)-I(7)-Ge(3) | 68.49(3)   |
|                                                    | Ge(2)-I(6)-Ge(3) | 75.96(3)   |
|                                                    | Ge(2)-I(1)-Ge(1) | 171.39(3)  |
|                                                    | Ge(2)-I(5)-Ge(3) | 78.04(3)   |
|                                                    | Ge(1)-I(7)-Ge(2) | 162.14(3)  |
| (ETU)GeI <sub>4</sub>                              | Ge(2)-I(5)-Ge(1) | 162.06(3)  |
|                                                    | Ge(2)-I(6)-Ge(2) | 157.40(3)  |
|                                                    | Ge(1)-I(3)-Ge(1) | 167.58(4)  |
|                                                    | Sn(2)-I(3)-Sn(1) | 167.06(5)  |
| (ETU)SnI <sub>4</sub>                              | Sn(2)-I(7)-Sn(2) | 168.39(6)  |
|                                                    | Sn(1)-I(1)-Sn(2) | 159.25(5)  |
|                                                    | Sn(1)-I(2)-Sn(1) | 155.42(5)  |
| (ETU)PbI <sub>4</sub>                              | Pb(2)-I(2)-Pb(1) | 146.06(5)  |
|                                                    | Pb(1)-I(3)-Pb(1) | 154.50(5)  |

## Section II. Simulated and experimental powder X-ray diffraction (PXRD) patterns

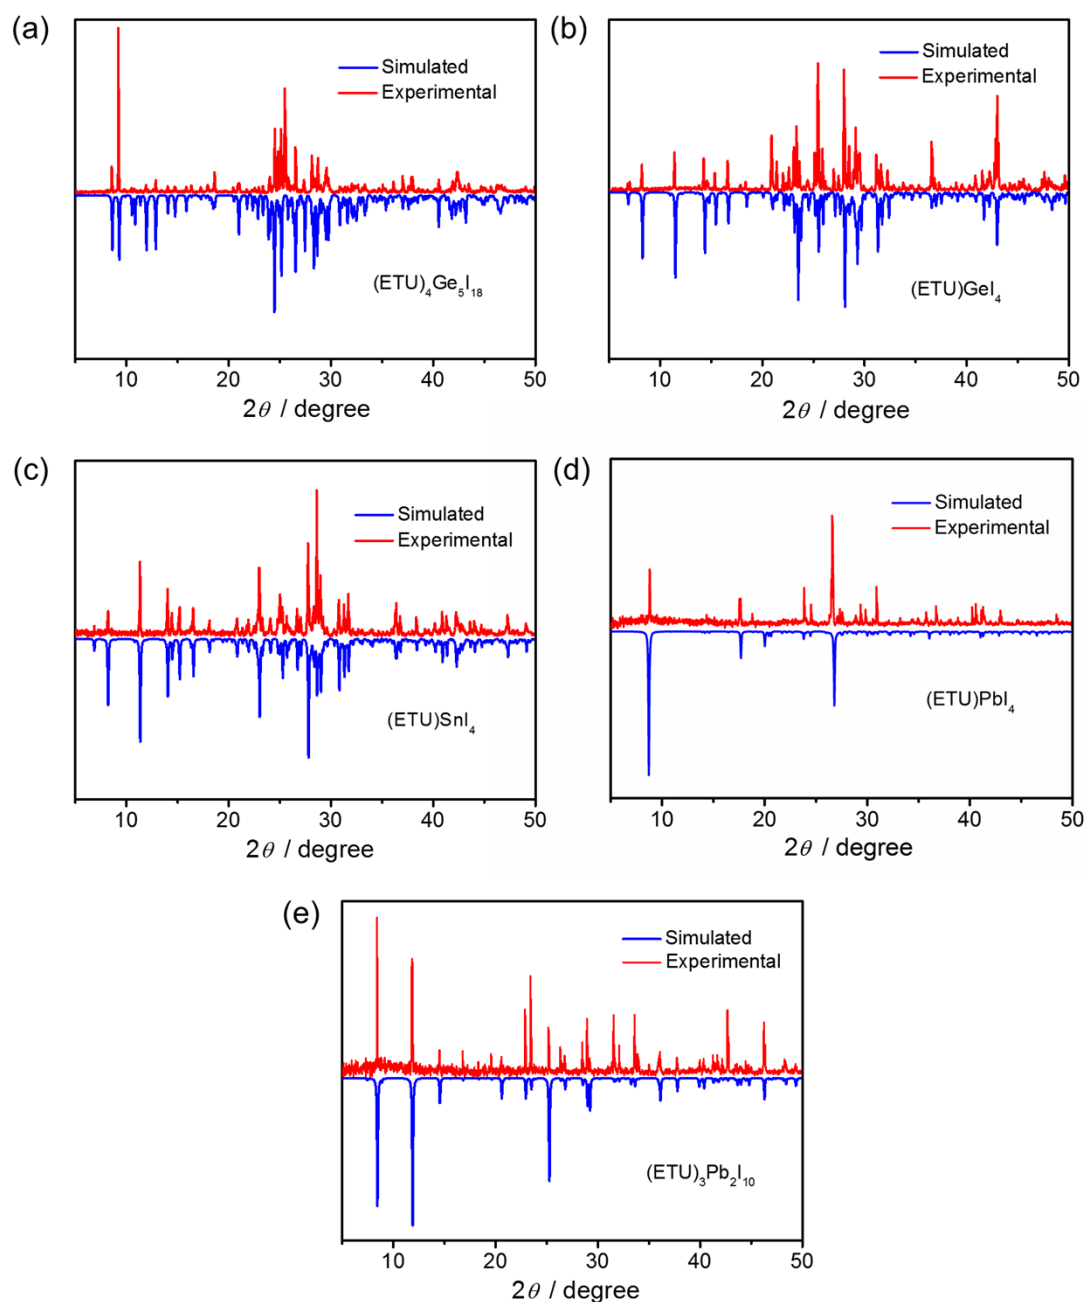

**Fig. S1** Comparison of the experimental and simulated PXRD patterns for  $(\text{ETU})_4\text{Ge}_5\text{I}_{18}$  (a),  $(\text{ETU})\text{GeI}_4$  (b),  $(\text{ETU})\text{SnI}_4$  (c),  $(\text{ETU})\text{PbI}_4$  (d) and  $(\text{ETU})_3\text{Pb}_2\text{I}_{10}$  (e). Due to the large size of the crystal in test for  $(\text{ETU})\text{PbI}_4$ , the crystal anisotropy along the (110) crystal face is more prominent.

Section III. Extra structural illustrations

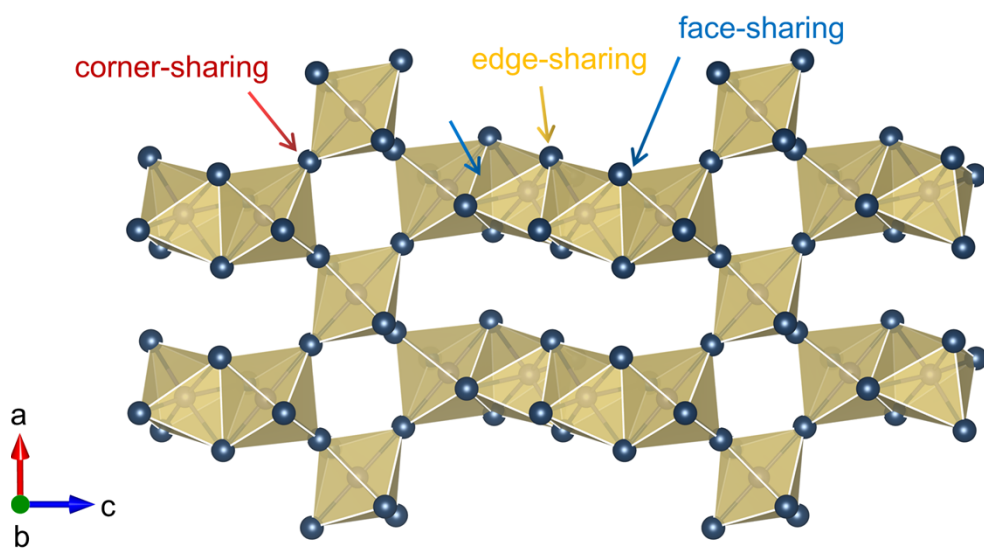

**Fig. S2** Inorganic layer configuration of  $(\text{ETU})_4\text{Ge}_5\text{I}_{18}$  along the  $b$  axis. Arrow symbol: blue (face-sharing), yellow (edge-sharing), red (corner-sharing).

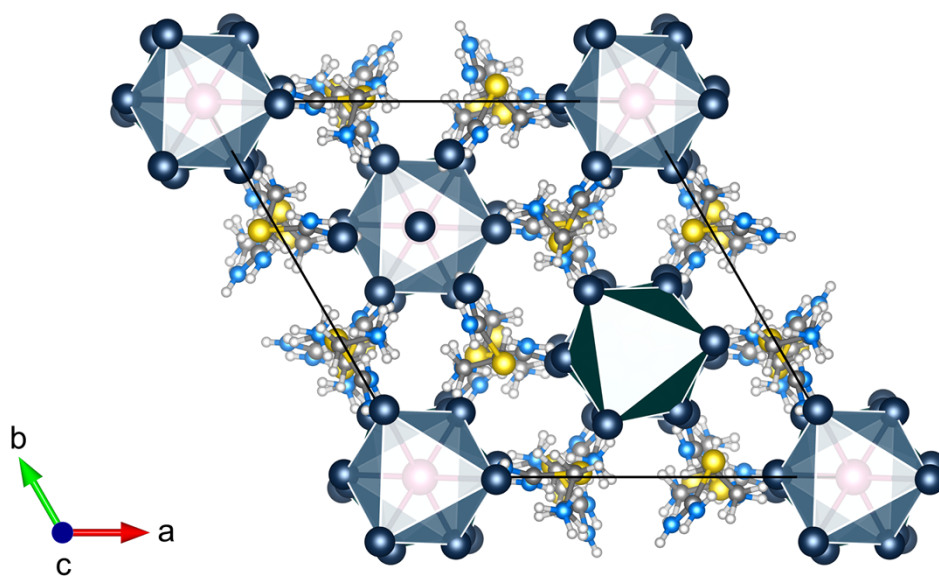

**Fig. S3** Crystal structures of  $(\text{ETU})_3\text{Pb}_2\text{I}_{10}$  along the  $c$  axis.
